# Supplementary material for: Nanoflower electrocatalysts derived from mixed metal (Fe/Co/Ni) organic frameworks for the electrochemical oxygen evolution reaction
Source: Royal Society of Chemistry journal article supplement (doi:10.1039/d3ce00360d), 2023-01-01
Supplement: d3ce00360d1.pdf [file d3ce00360d1.pdf]

## Supplementary Information

### **Nanoflower electrocatalysts derived from mixed metal (Fe/Co/Ni) organic framework for electrochemical oxygen evolution reaction**

**Jiangyan Dang,<sup>†a</sup> Jingjing Qiu,<sup>†a</sup> Xiaoying Zhang,<sup>a,\*</sup> Ruifa Jin,<sup>b</sup> Bowen Qin,<sup>c</sup> and Jingping Zhang<sup>a,\*</sup>**

<sup>a</sup> Advanced Energy Materials Research Center, Faculty of Chemistry, Northeast Normal University, Changchun 130024, P. R. China.

E-mail: [jpzhang@nenu.edu.cn](mailto:jpzhang@nenu.edu.cn); [zhangxy218@nenu.edu.cn](mailto:zhangxy218@nenu.edu.cn).

<sup>b</sup> Inner Mongolia Key Laboratory of Photoelectric Functional Materials, College of Chemistry and Life Sciences, Chifeng University, Chifeng 024000, P. R. China.

<sup>c</sup> College of Materials Engineering, Henan International Joint Laboratory of Rare Earth Composite Materials, Henan University of Engineering, Zhengzhou 451191, P. R. China.

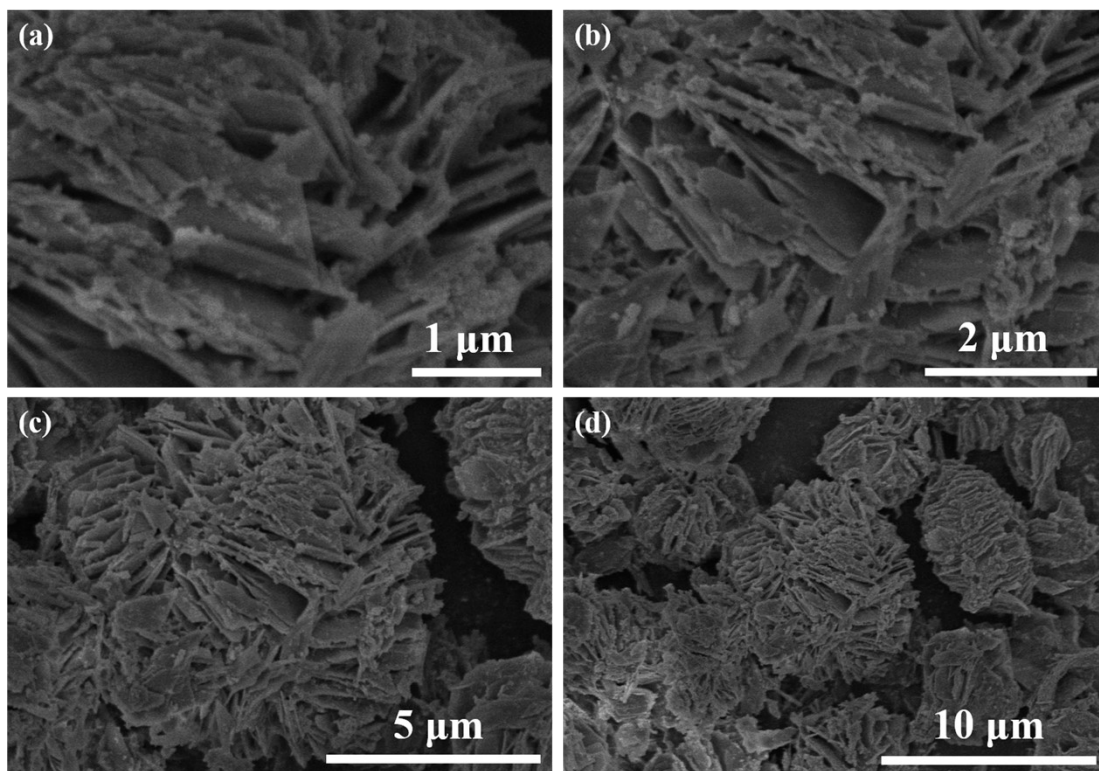

**Fig. S1** SEM images of NiCoFe-MOF-1 in different sizes.

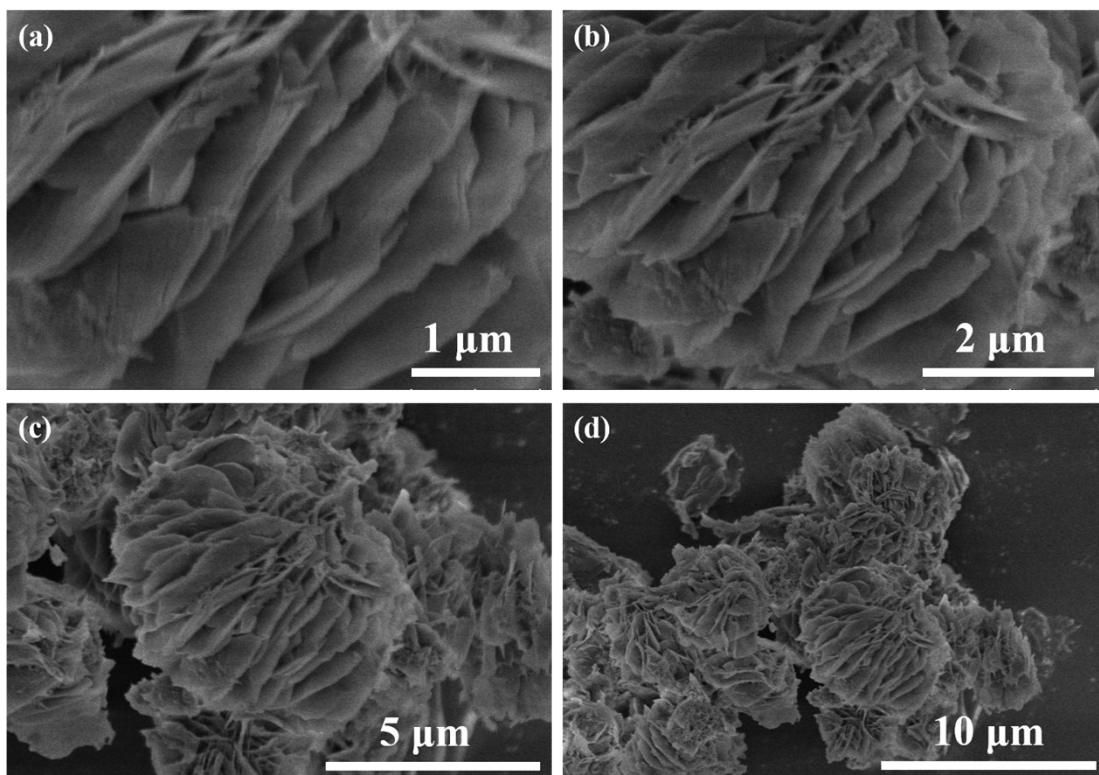

**Fig. S2** SEM images of NiCoFe-MOF-3 in different sizes.

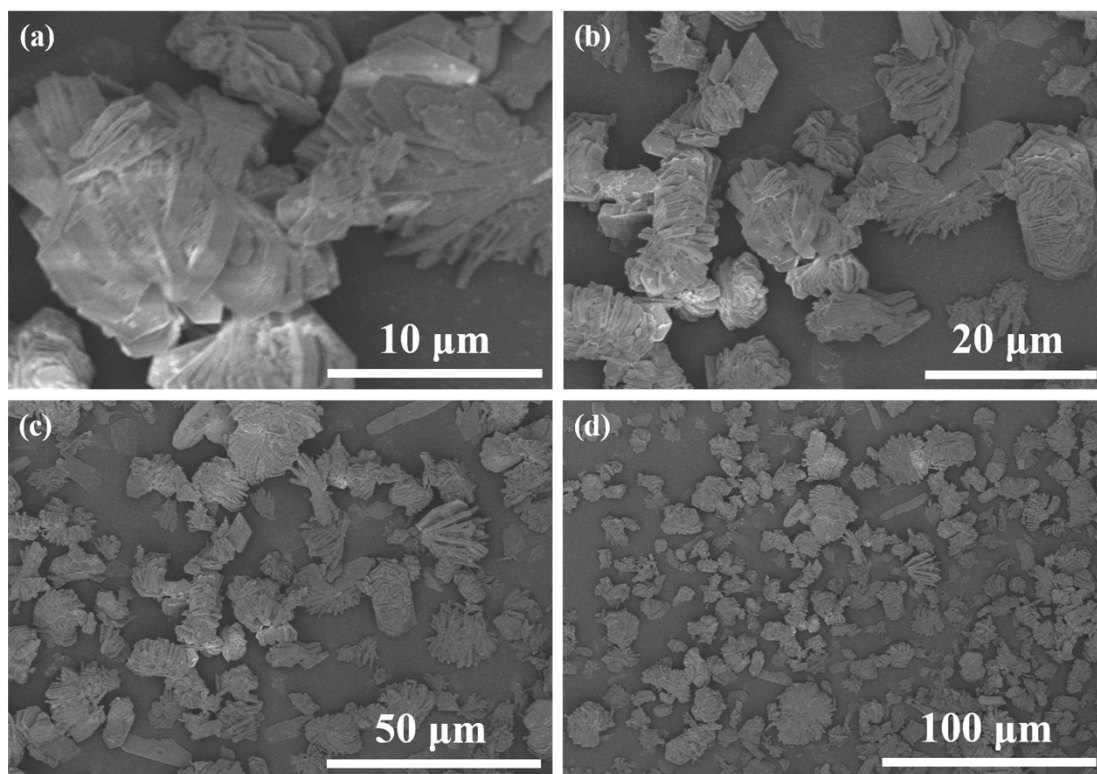

**Fig. S3** SEM images of NiFe-MOF-1 in different sizes.

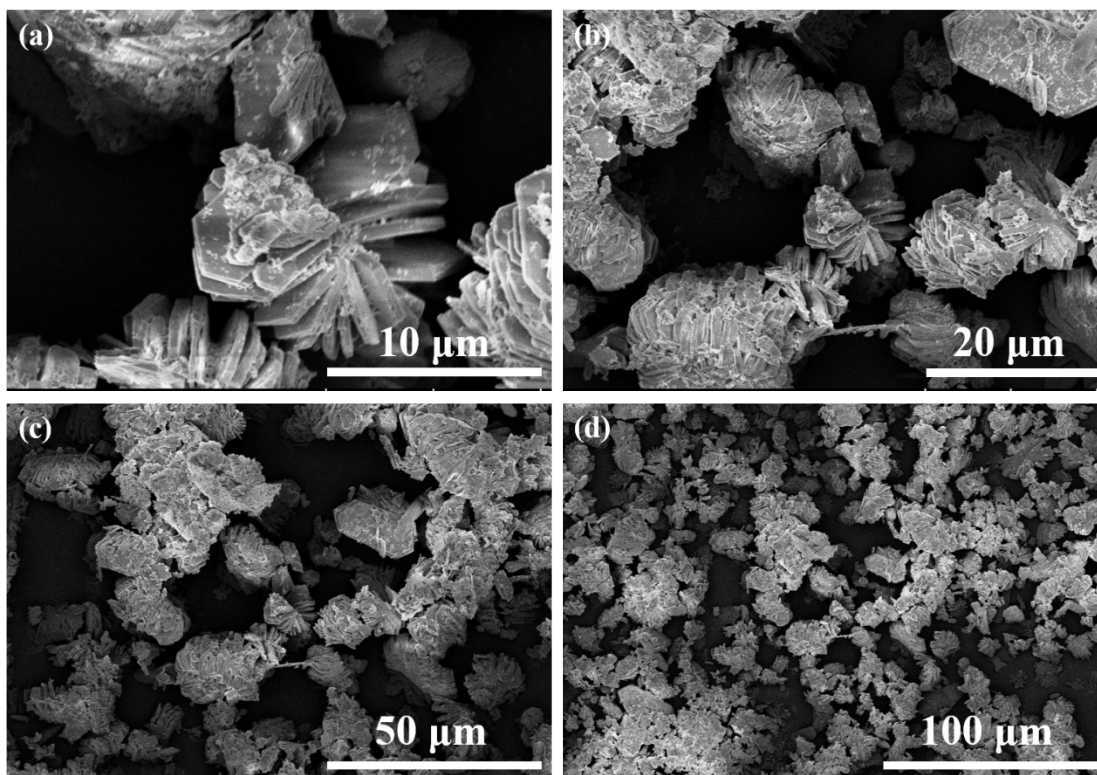

**Fig. S4** SEM images of NiFe-MOF-2 in different sizes.

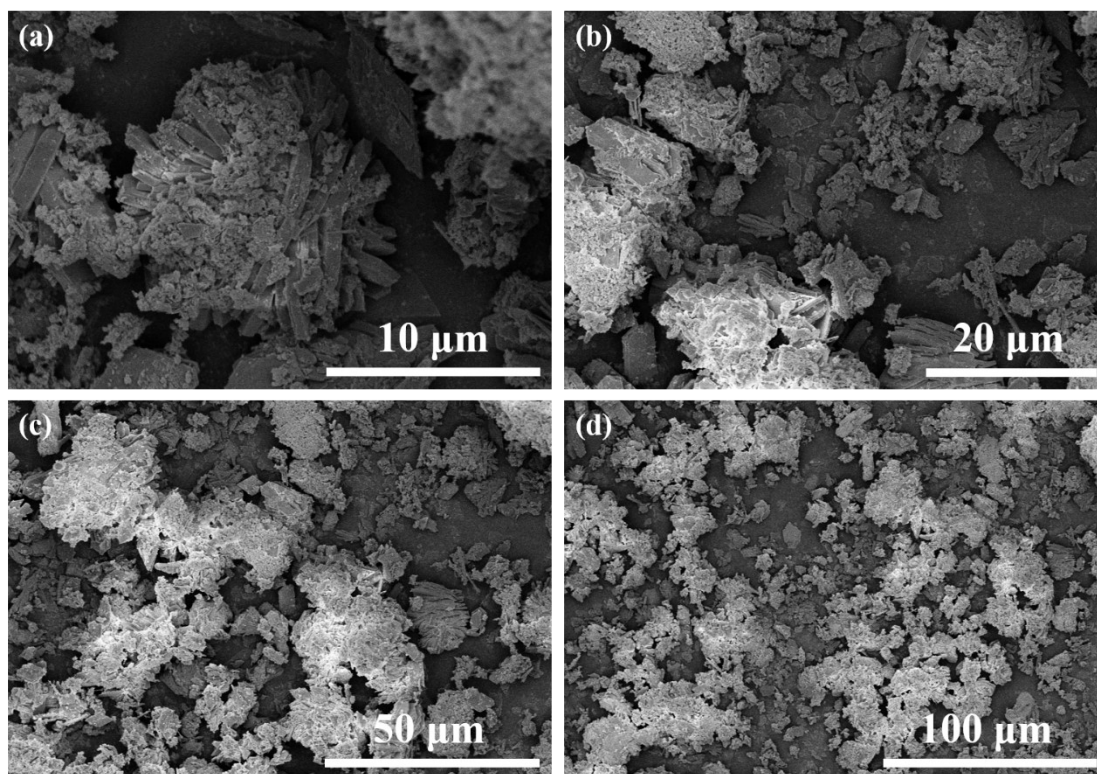

**Fig. S5** SEM images of NiFe-MOF-3 in different sizes.

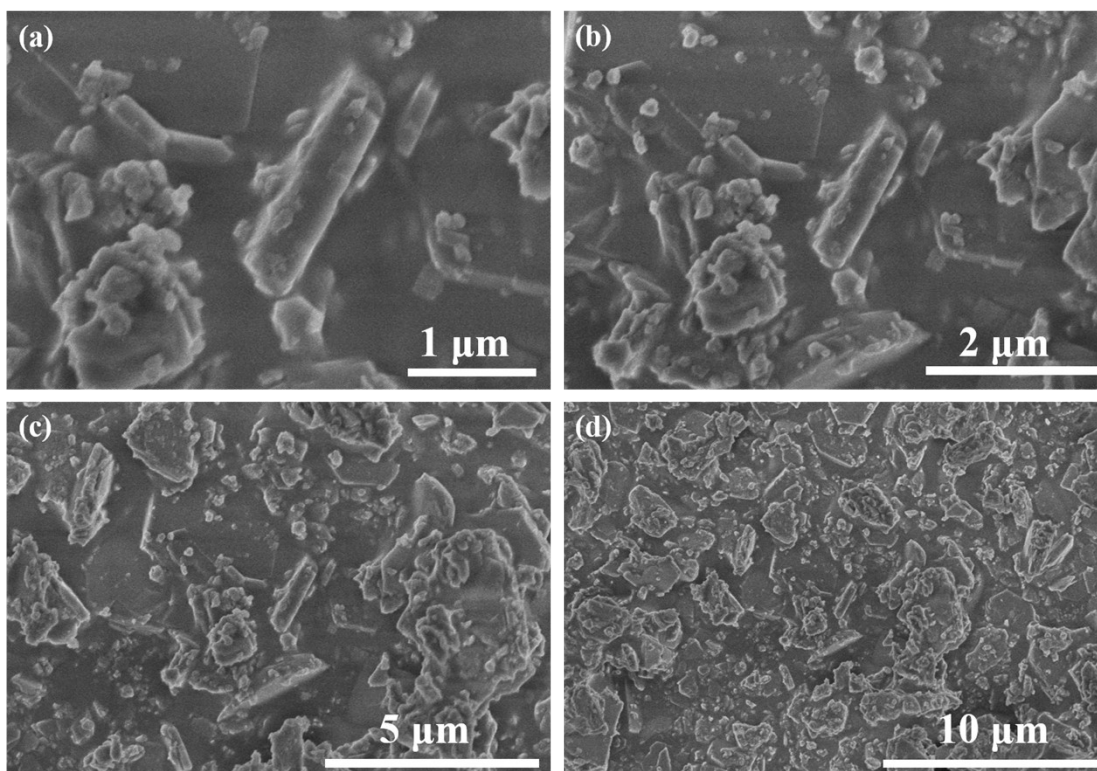

**Fig. S6** SEM images of Ni-MOF in different sizes.

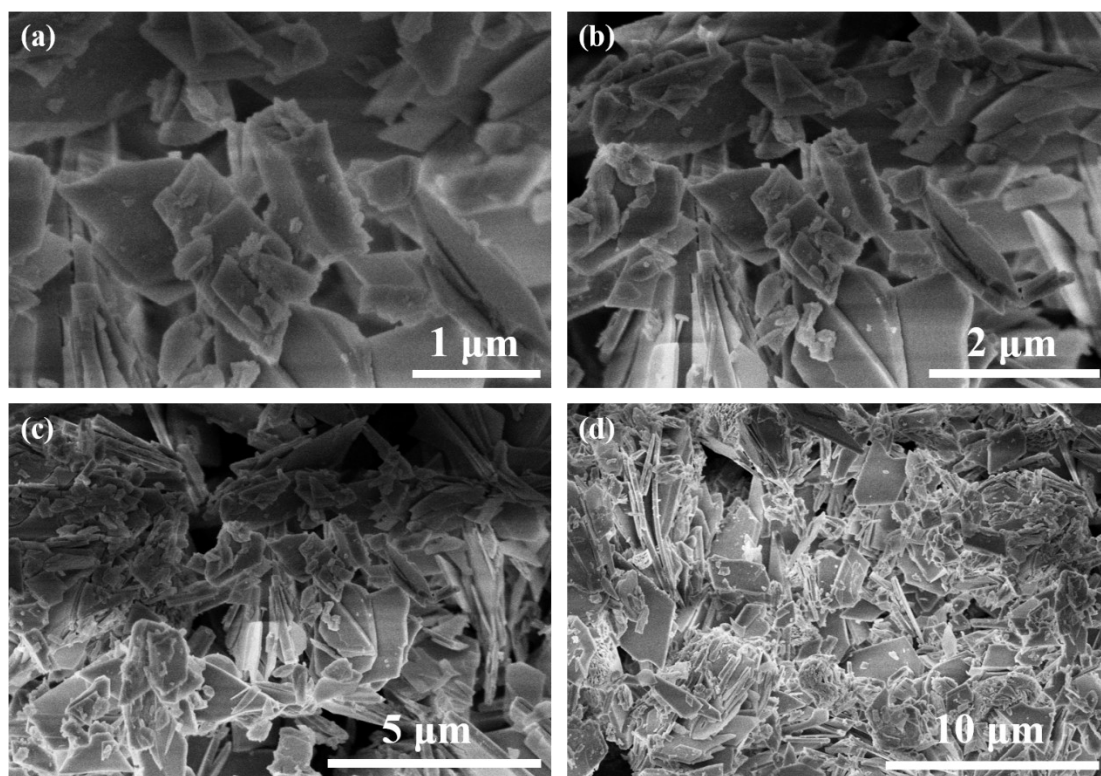

**Fig. S7** SEM images of Co-MOF in different sizes.

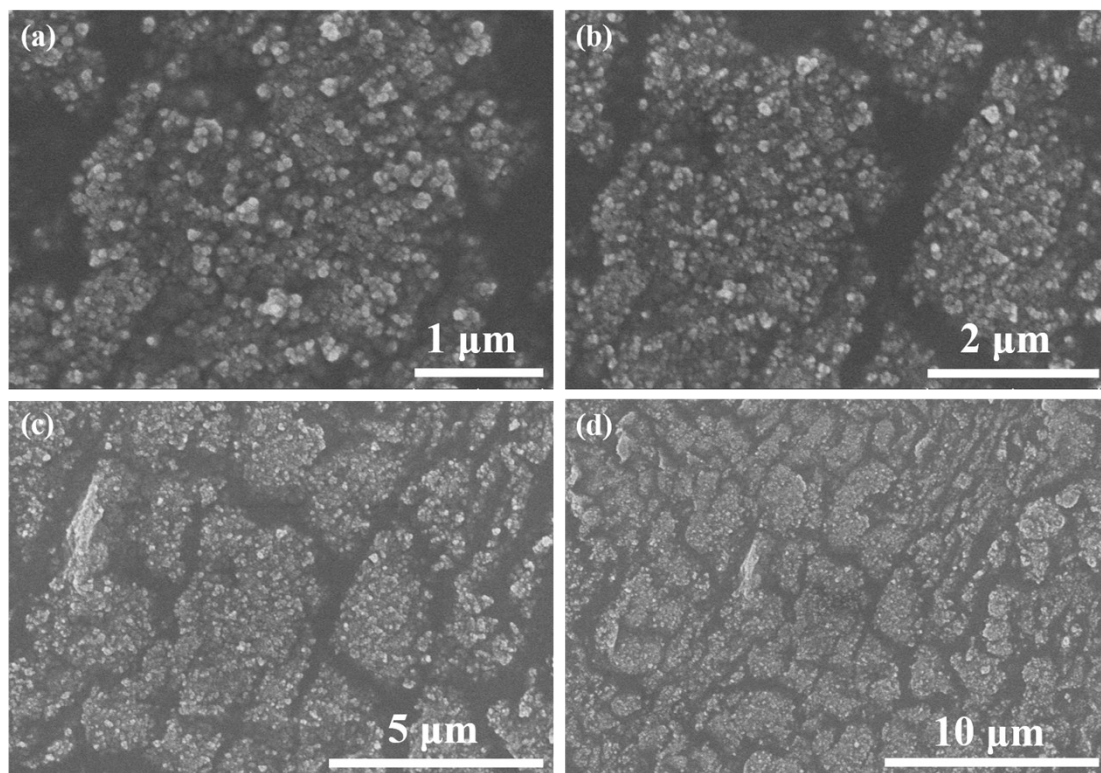

**Fig. S8** SEM images of Fe-MOF in different sizes.

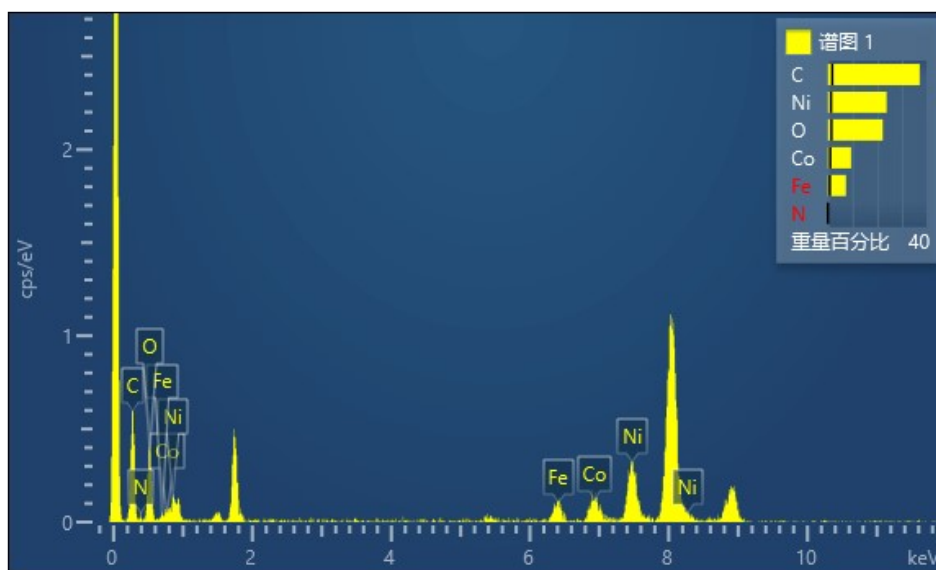

Fig. S9 EDS of NiCoFe-MOF-2.

Table S1 The mass percent of three elements in NiCoFe-MOF-2 measured by ICP.

| element species | mass percent | mole     |
|-----------------|--------------|----------|
| Ni              | 11.90 wt%    | 0.015600 |
| Co              | 5.79 wt%     | 0.007554 |
| Fe              | 5.30 wt%     | 0.007259 |

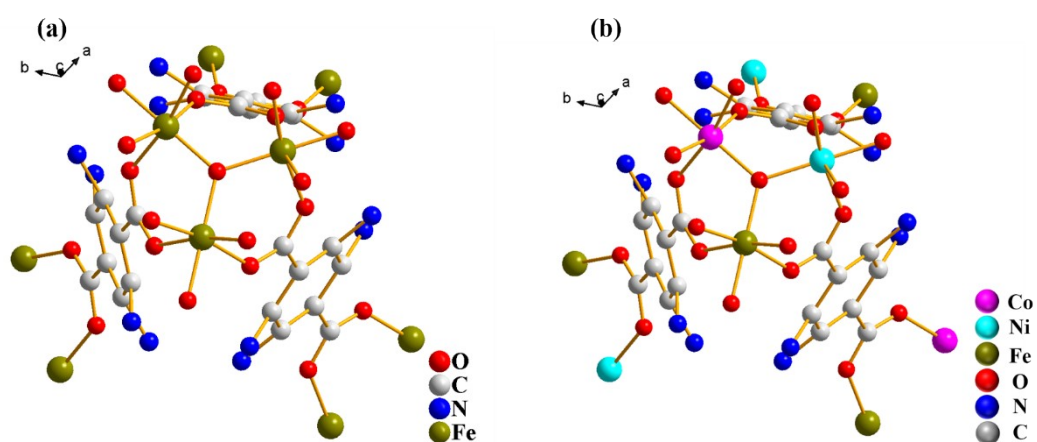

Fig. S10 (a) Structural unit of  $\text{NH}_2\text{-Fe-MIL-88b}$ ; (b) Ideal structural unit of NiCoFe-MOF-2.

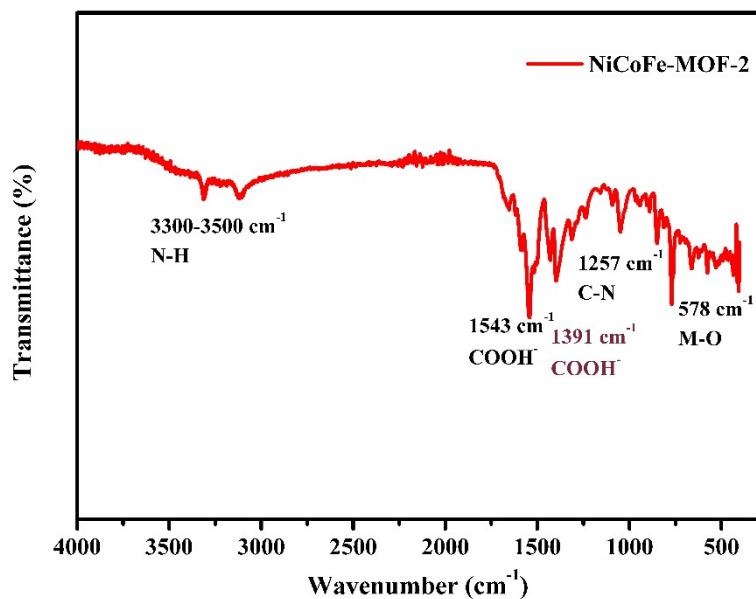

Fig. S11 FTIR spectra of NiCoFe-MOF-2.

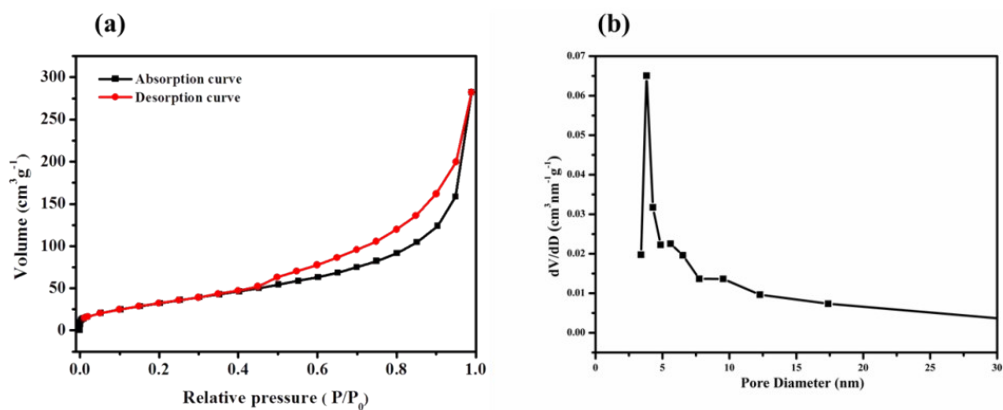

Fig. S12 (a) Nitrogen adsorption and desorption isothermals of NiCoFe-MOF-2; (b) Barrett-Joyner-Halenda desorption pore-size distributions for NiCoFe-MOF-2.

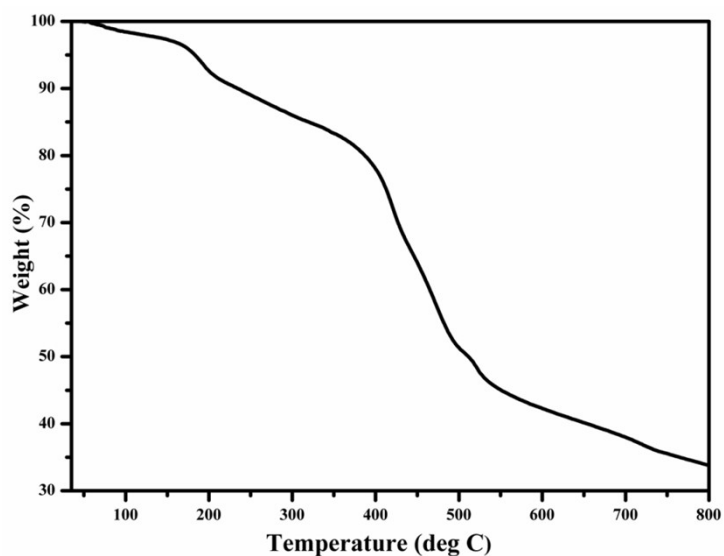

Fig. S13 The TGA of NiCoFe-MOF-2 in Nitrogen atmosphere.

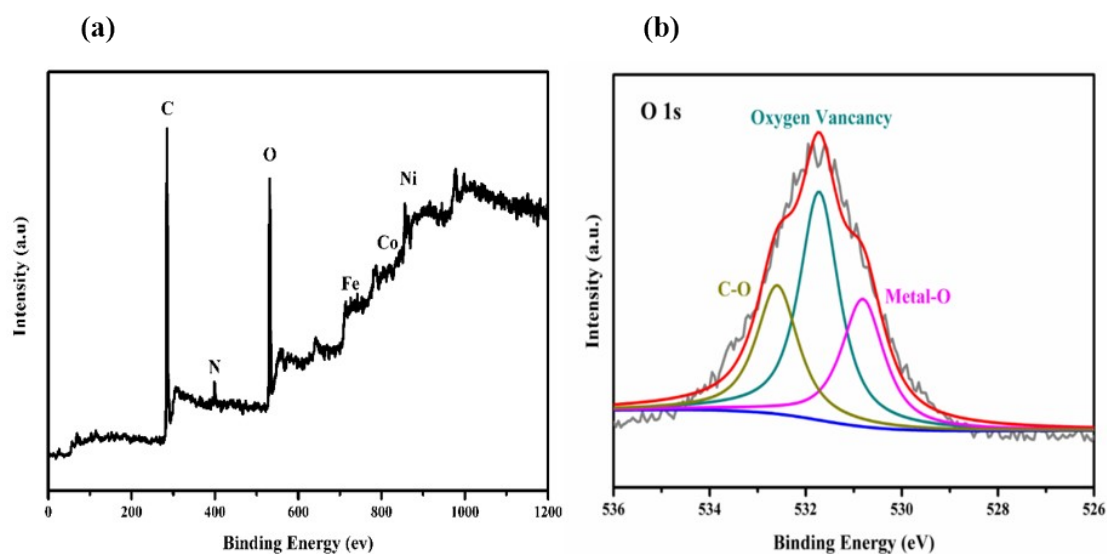

**Fig. S14** (a) XPS full survey spectrum of NiCoFe-MOF-2; (b) High resolution XPS spectra for O 1s.

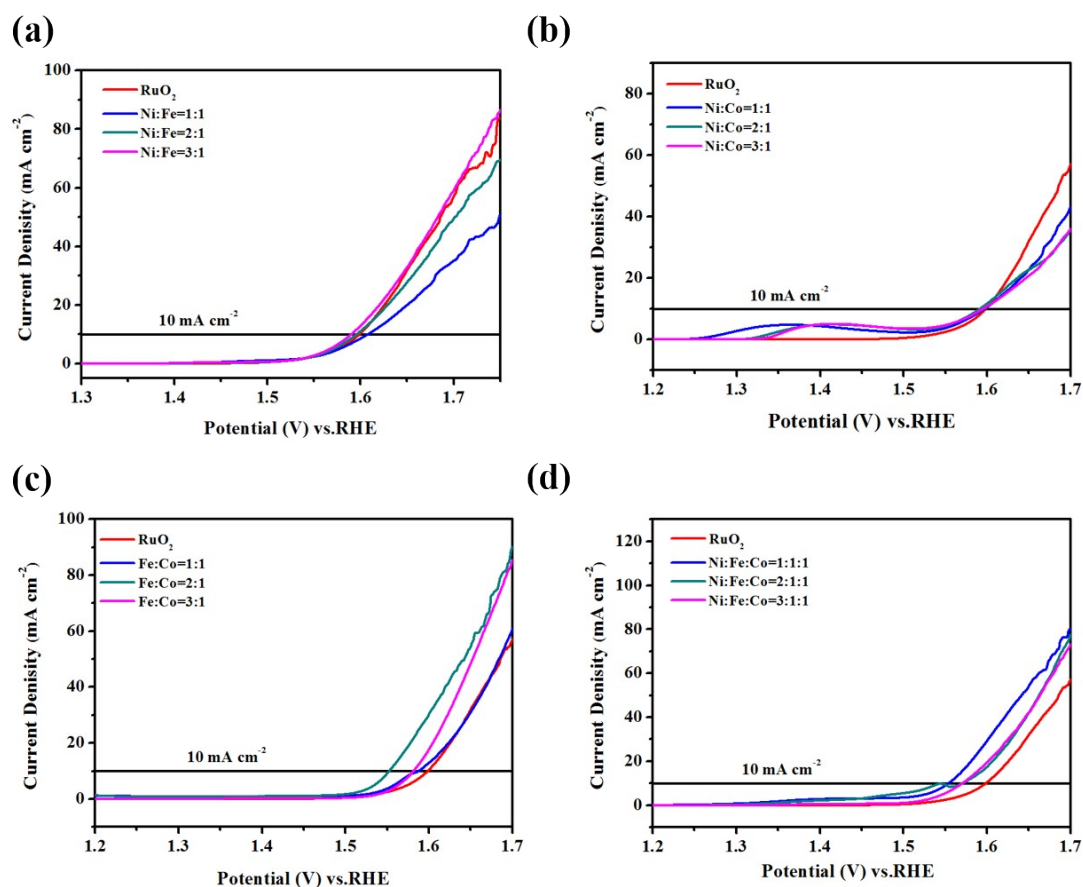

**Fig. S15** LSV curves toward OER of different samples.



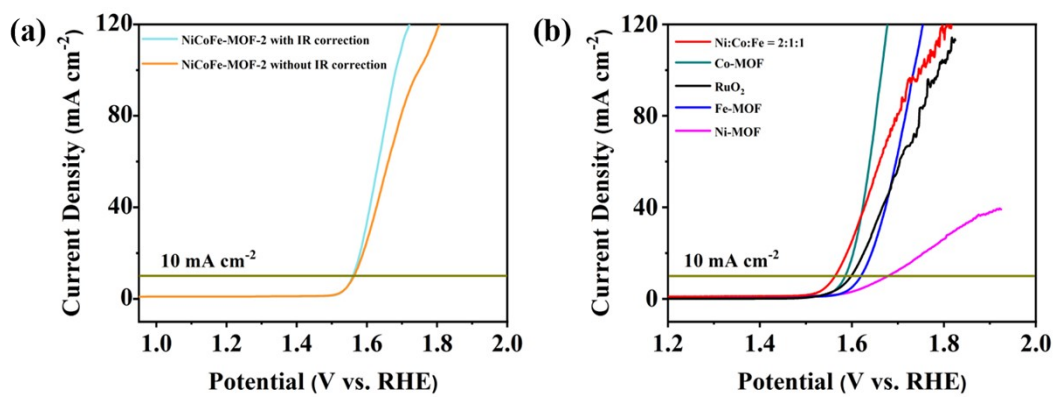

**Fig. S16** (a) The LSV curves of NiCoFe-MOF-2 with and without IR correction; (b) LSV curves toward OER of different samples.

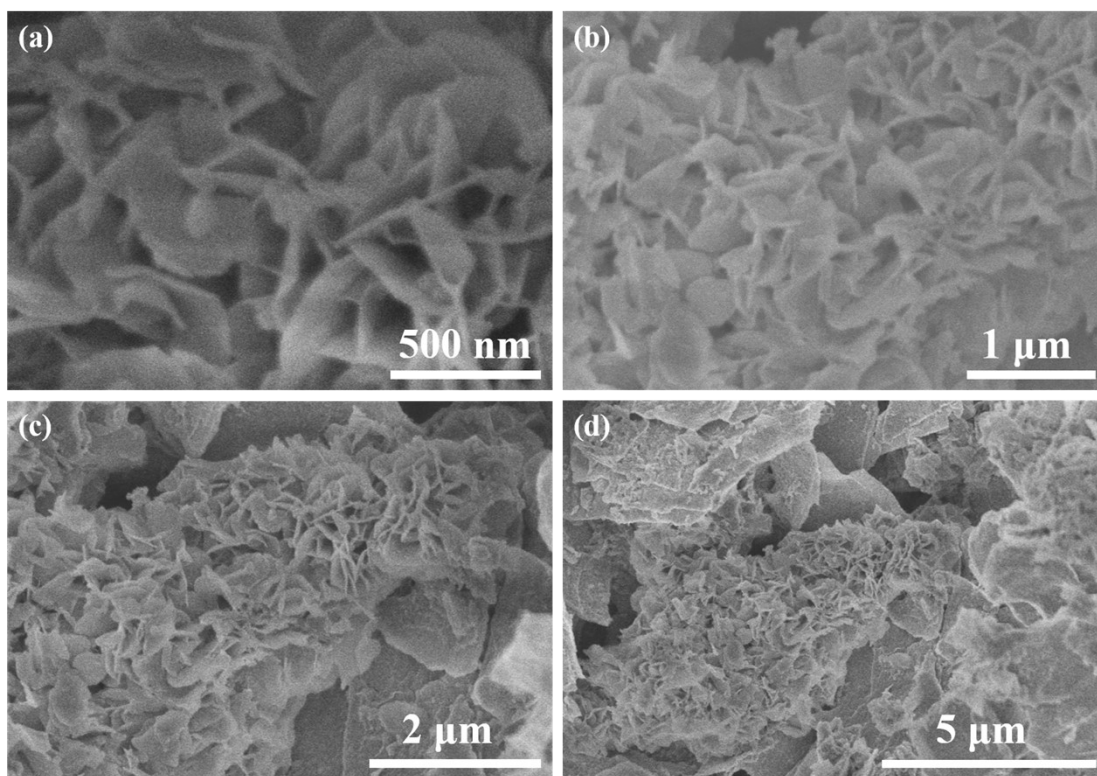

**Fig. S17** SEM images of NiCoFe-MOF-2 in different sizes after OER stability test.

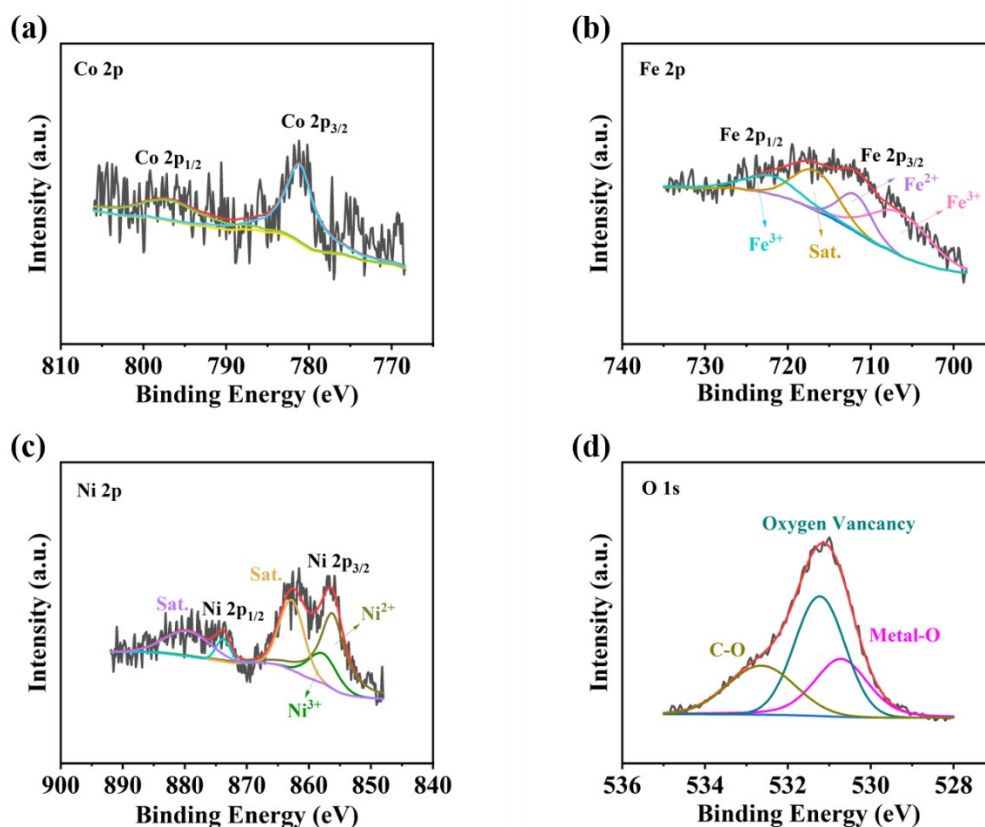

**Fig. S18** (a-d) High-resolution XPS spectra of Co 2p, Fe 2p, Ni 2p and O 1s after OER stability test.

**Table S2.** Comparison of OER performance of some recently reported MOFs electrocatalysts in alkaline electrolyte solution.

| Material                                    | Electrolyte      | $E_{j=10}$ (mV) vs. RHE | Tafel slop (mV dec <sup>-1</sup> ) | Reference        |
|---------------------------------------------|------------------|-------------------------|------------------------------------|------------------|
| <b>NiCoFe-MOF-2</b>                         | <b>1.0 M KOH</b> | <b>321</b>              | <b>48</b>                          | <b>This work</b> |
| Fe-Co-MOF (1:3)                             | 1.0 M KOH        | 328                     | 37                                 | 1                |
| FeNi@CNF                                    | 1.0 M KOH        | 356                     | 62.6                               | 2                |
| CoFe-MOF-OH                                 | 1.0 M KOH        | 265                     | 44                                 | 3                |
| 2D CoZIF-9(III) sheets                      | 0.1 M KOH        | 380                     | 55                                 | 4                |
| MOF-(Fe <sub>1</sub> -Co <sub>3</sub> )550N | 0.1 M KOH        | 390                     | 72.9                               | 5                |
| ZIF-8-C (C4&C6)                             | 0.1 M KOH        | 476                     | 78.5                               | 6                |
| FeCo&FeCoNi                                 | 1.0 M KOH        | 288                     | 60                                 | 7                |
| CoNi@OCNP                                   | 1.0 M KOH        | 373                     | 75                                 | 8                |

## Electrochemical measurements

The electrochemical properties of the materials were evaluated in a three-electrode system on a CHI-760E electrochemical workstation (Chenhua instrument co., LTD., Shanghai) at room temperature. In a standard three-electrode system, different samples are coated on the glassy carbon electrode and used directly as the working electrode, and then the Hg/HgO electrode and the Pt electrode are used as the reference electrode and the counter electrode, respectively. All measured potentials were calibrated to the reversible hydrogen electrode (RHE) based on the Nernst equation:  $E_{RHE} = E_{Hg/HgO} + 0.059 \text{ pH} + 0.098$ . The steady-state linear sweep voltammetry (LSV) curves were obtained at a scan rate of  $5 \text{ mV s}^{-1}$  in  $1.0 \text{ M KOH}$  solution. The measurements of electrochemical impedance spectroscopies (EIS) were conducted at a frequency range from  $0.01 \text{ Hz}$  to  $100000 \text{ Hz}$ . The overpotential ( $\eta$ ) is calculated according to the formula  $\eta = E_{RHE} - 1.23$ . The Tafel slope is

calculated according to the Tafel equation, namely  $\eta = b \log_{10} \left( \frac{j}{j_0} \right)$ , where  $\eta$  represents the overpotential,  $b$  represents the Tafel slope,  $j$  is the current density,  $j_0$  represents the exchange current density. In order to determine the electrochemical active surface area (ECSA), the double layer capacitance ( $C_{dl}$ ) of the electrode can be obtained by carrying out the CV measurement and the ECSA can be calculated by  $C_{dl}$  using the formula:  $ECSA = C_{dl} / C_s$  ( $C_s$  is assuming as  $0.040 \text{ mF cm}^{-2}$ )<sup>9</sup>. To evaluate the ECSA of the catalyst, the  $C_{dl}$  of the catalyst is calculated. The CV test with sweep speed of  $20 \text{ mV s}^{-1}$ - $100 \text{ mV s}^{-1}$  is carried out in non-Faraday voltage region.  $C_{dl}$  is a linear fitting of sweep speed between  $20 \text{ mV s}^{-1}$ - $100 \text{ mV s}^{-1}$  by current density at potential  $1.025 \text{ V}$ , and the slope obtained is the value of  $C_{dl}$ .

## Reference

- 1 Y. Dang, P. Han, Y. Li, Y. Zhang and Y. Zhou, *J. Mater. Sci.*, 2020, **55**, 13951-13963.
- 2 Y. Li, M. Lu, P. He, Y. Wu, J. Wang, D. Chen, H. Xu, J. Gao and J. Yao, *Chem. an Asian J.*, 2019, **14**, 1590-1594.
- 3 Z. Zou, T. Wang, X. Zhao, W.-J. Jiang, H. Pan, D. Gao and C. Xu, *ACS Catal.*, 2019, **9**, 7356-7364.
- 4 K. Jayaramulu, J. Masa, D.M. Morales, O. Tomanec, V. Ranc, M. Petr, P. Wilde, Y. T. Chen, R. Zboril, W. Schuhmann and R.A. Fischer, *Adv. Sci.*, 2018, **5**, 1801029.
- 5 Y. Han, J. Zhai, L. Zhang and S. Dong, *Nanoscale*, 2016, **8**, 1033.
- 6 Y. Lei, L. Wei, S. Zhai, Y. Wang, H.E. Karahan, X. Chen, Z. Zhou, C. Wang, X. Sui and Y. Chen, *Mater. Chem. Front.*, 2018, **2**, 102-111
- 7 Y. Yang, Z. Lin, S. Gao, J. Su, Z. Lun, G. Xia, J. Chen, R. Zhang and Q. Chen, *ACS Catal.*, 2017, **7**, 469-479
- 8 P. He, Y. Wu, H. Chen, Z. Zhu, H. Liu, J. Gao and H. Xu, *J. Alloys Compd.*, 2020, **813**, 152192.
- 9 L. Zhou, M. Guo, Y. Li, Q. Gu, W. Zhang, C. Li, F. Xie, D. Lin and Q. Zheng, *Chem. Commun.*, 2019, **55**, 4218-4221.
